# Supplementary material for: Identification of Potential Human Ryanodine Receptor 1 Agonists and Molecular Mechanisms of Natural Small-Molecule Phenols as Anxiolytics
Source: PubMed Central journal article supplement — ACS Omega. 2021 Oct 29;6(44):29940–54. doi: 10.1021/acsomega.1c04468 (PMC8582060; doi:10.1021/acsomega.1c04468), 2021-10-29
Supplement: ao1c04468_si_001.pdf [file ao1c04468_si_001.pdf]

## **Electronic Supplementary Material**

# **Identification of Potential human Ryanodine Receptor 1 Agonists and Molecular Mechanisms of Natural Small-molecule Phenols as Anxiolytics**

Yahong Chen<sup>1</sup>, Xiaohong Wang<sup>1</sup>, Haifeng Zhai<sup>2</sup>, Yanling Zhang<sup>1</sup>, Jianmei Huang<sup>1\*</sup>

<sup>1</sup>*School of Chinese Materia Medica, Beijing University of Chinese Medicine, Yangguang South Road, Fangshan District, Beijing 102488, China*

<sup>2</sup>*National Institute on Drug Dependence, Peking University, 38#, Xueyuan Road, Haidian District, Beijing 100191, China*

**Corresponding author.E-mail:** Jianmei Huang; huangjm@bucm.edu.cn

**Figure S1. The structural information of 132 NSMPs.**

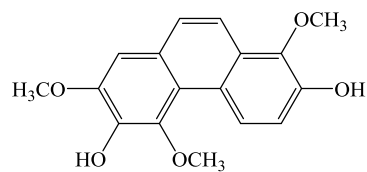

1,5,7-Trimethoxy-2,6-phenanthrenediol

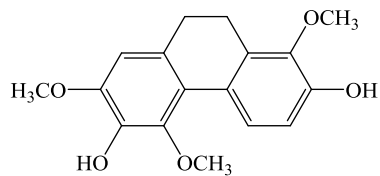

1,5,7-Trimethoxy-9,10-dihydro-2,6-phenanthrenediol

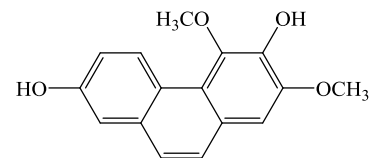

2,4-Dimethoxy-3,7-phenanthrenediol

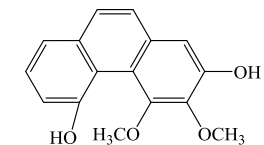

3,4-Dimethoxy-2,5-phenanthrenediol

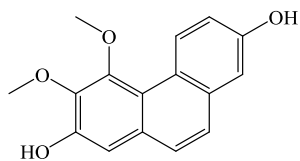

3,4-Dimethoxy-2,7-phenanthrenediol

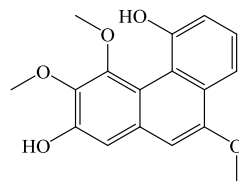

3,4,9-Trimethoxy-2,5-phenanthrenediol

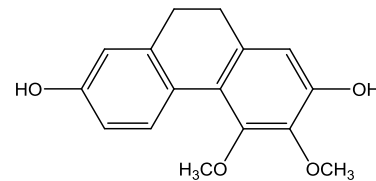

9,10-Dihydro-3,4-dimethoxy-2,7-phenanthrenediol

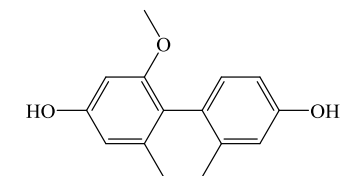

9,10-Dihydro-4-methoxy-2,7-phenanthrenediol

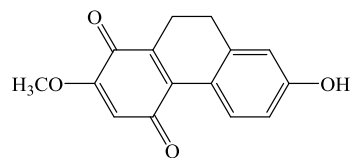

9,10-Dihydro-7-hydroxy-2-methoxy-1,4-phenanthrenedione

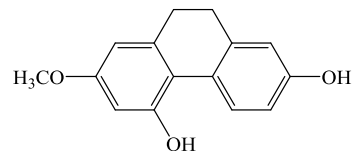

9,10-Dihydro-7-methoxy-2,5-phenanthrenediol

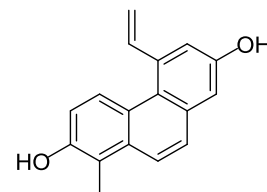

Dehydroeffusol

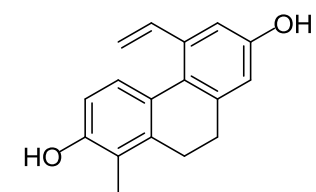

Effusol

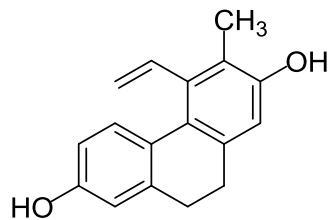

Juncusol

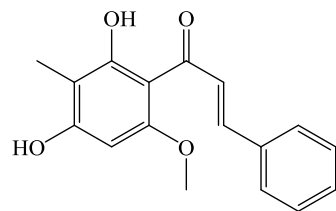

2',4'-Dihydroxy-6'-methoxy-3'-methylchalcone

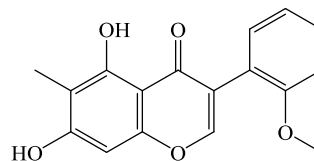

2'-O-methylabronisoflavone

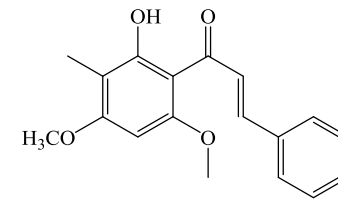

2'-hydroxy-4',6'-dimethoxy-3'-methylchalcone

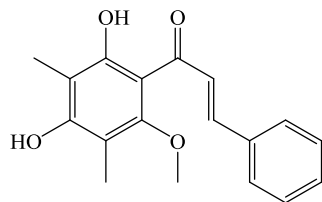

2',4'-Dihydroxy-6'-methoxy-3',5'-dimethylchalcone

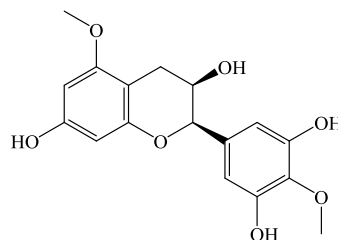

(-)-4'-Methylepigallocatechin

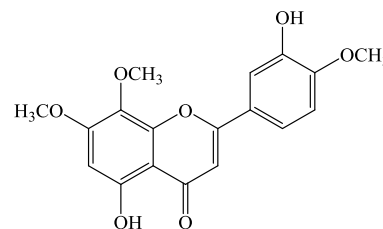

5,3'-Dihydroxy-7,8,4'-trimethoxyflavone

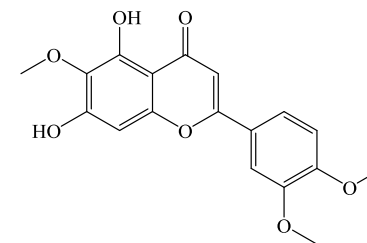

5,7-Dihydroxy-6,3',4'-trimethoxyflavone

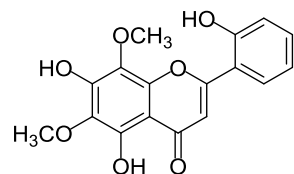

5,7,2'-Trihydroxy-6,8-dimethoxyflavone

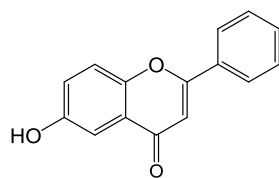

6-Hydroxyflavone

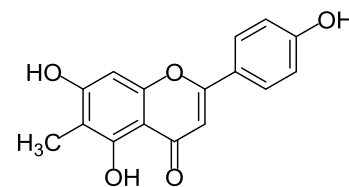

6-Methylapigenin

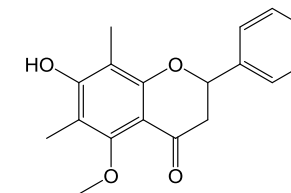

7-hydroxy-5-methoxy-6,8-dimethylflavanone

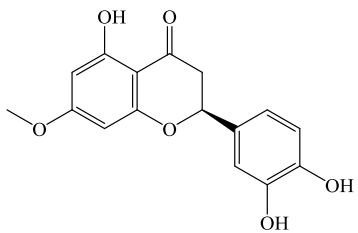

7-O-methyleriodictyol

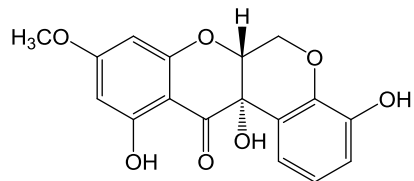

10-Demethylboeravinone C

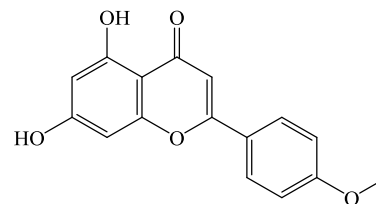

Acacetin

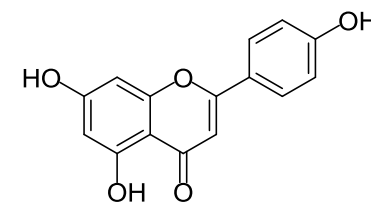

Apigenin

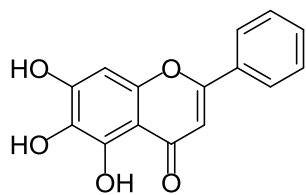

Baicalein

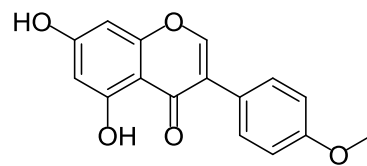

Biochanin A

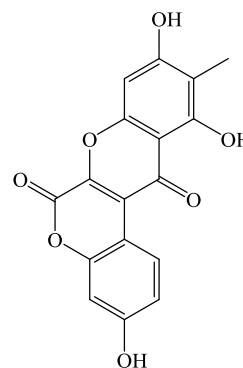

Boeravinone F

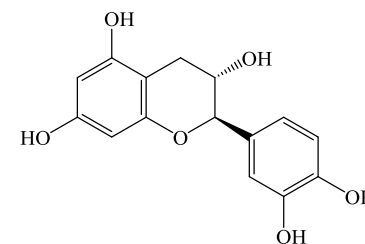

Catechin

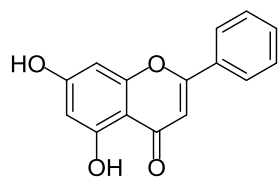

Chrysin

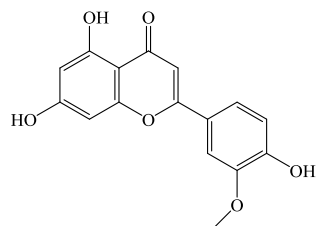

Chrysoeriol

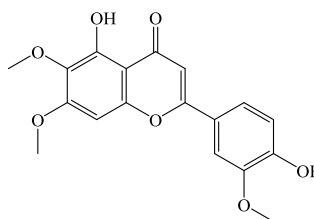

Cirsilineol

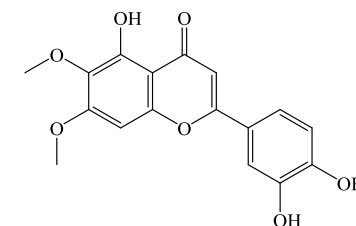

Cirsiliol

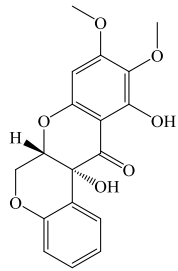

Coccineone E

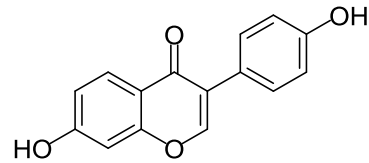

Daidzein

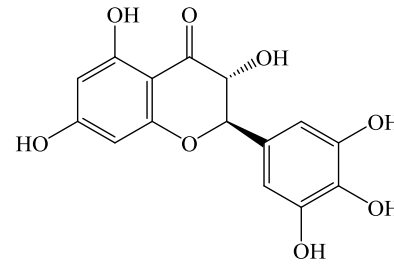

Dihydromyricetin

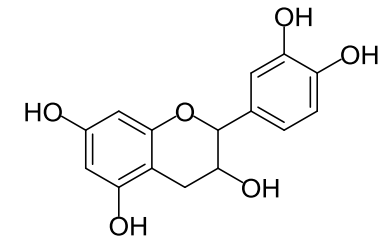

(-) Epicatechin

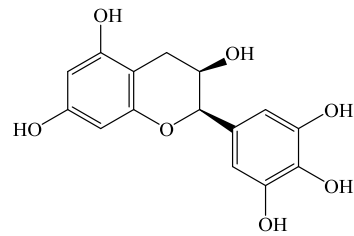

(-) Epigallocatechin

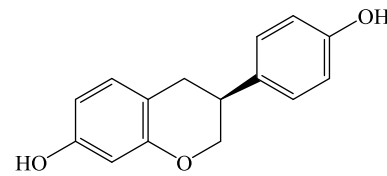

Equol

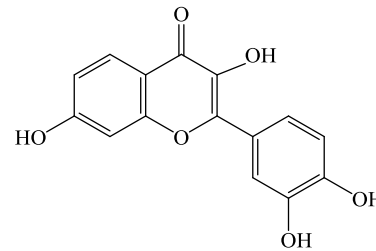

Fisetin

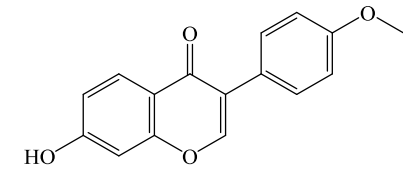

Formononetin

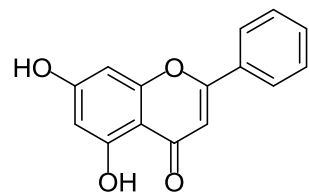

Chrysin

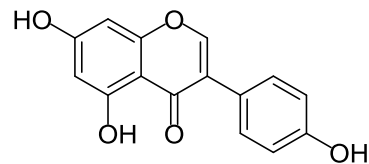

Genistein

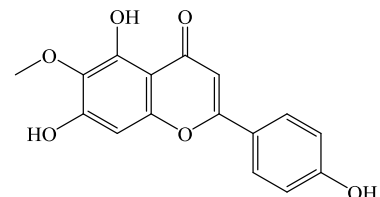

Hispidulin

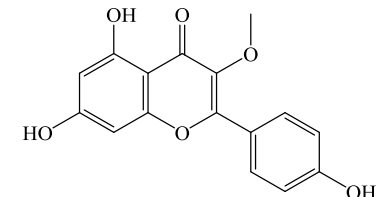

Isokaempferide

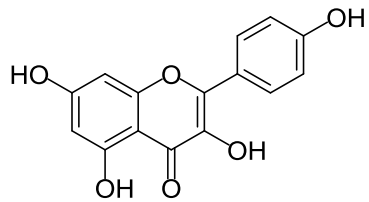

Kaempferol

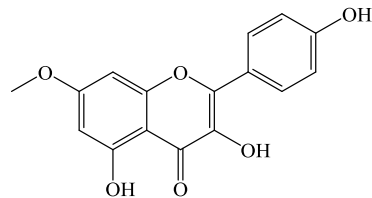

Kaempferol 7-methyl ether

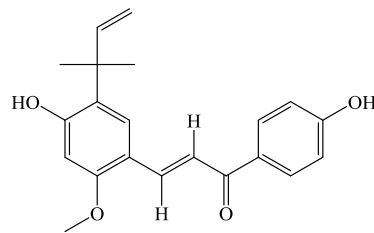

Licochalcone A

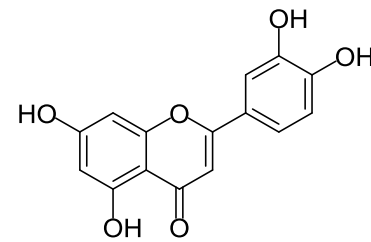

Luteolin (3',4',5,7-tetrahydroxyflavone)

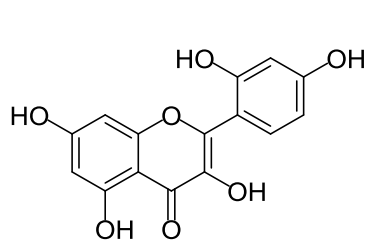

Morin

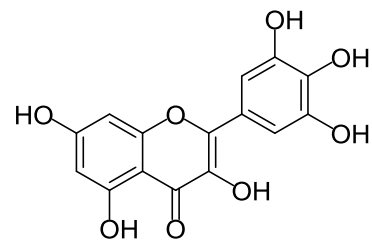

Myricetin

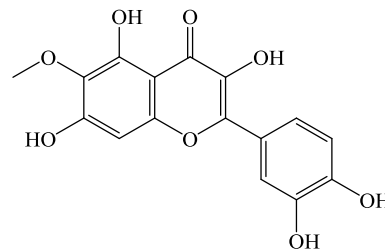

Patuletin

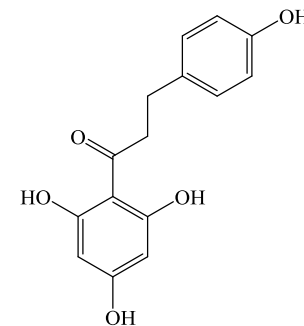

Phloretin

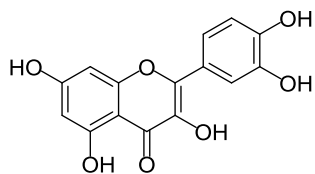

Quercetin

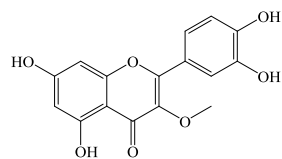

Quercetin 3-methyl

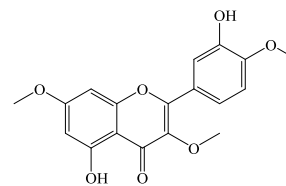

Quercetin 3,4',7-trimethyl ether

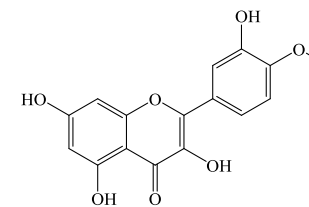

Quercetin 4'-methyl ether

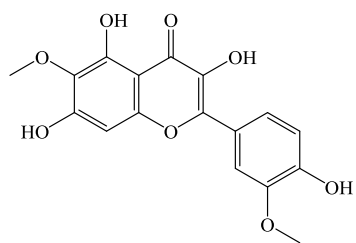

Spinacetin

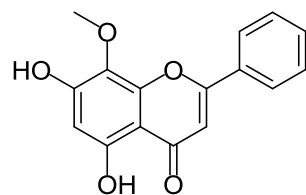

Wogonin

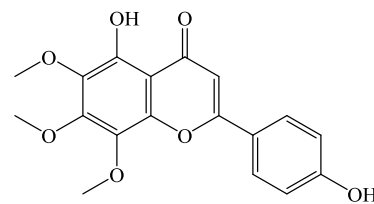

Xanthomicrol

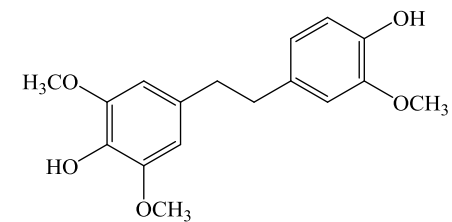

Aloifol II

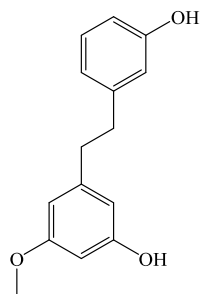

Batatasin III

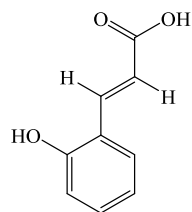

2-Hydroxycinnamic acid

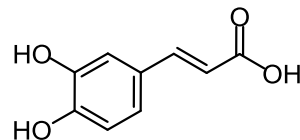

Caffeic acid

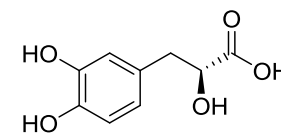

Danshensu [(3-(3,4-dihydroxyphenyl)-(2R)-lactic acid)]

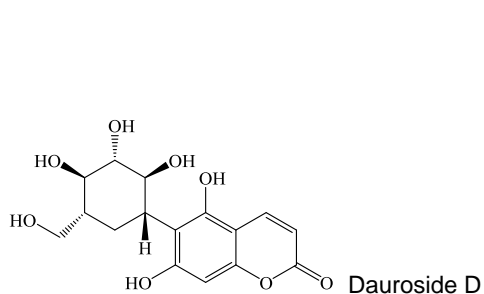

Daurosides

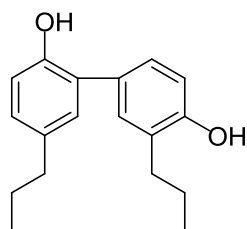

Dihydrohonokiol

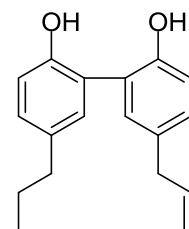

Dihydromagnolol

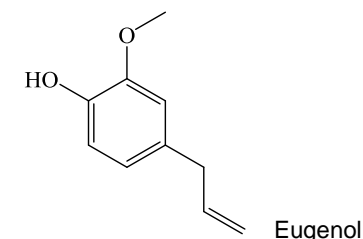

Eugenol

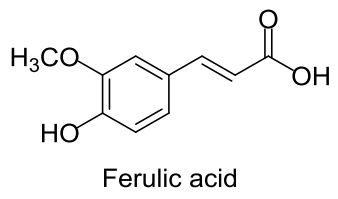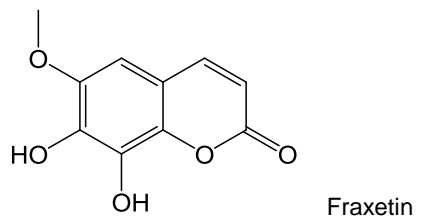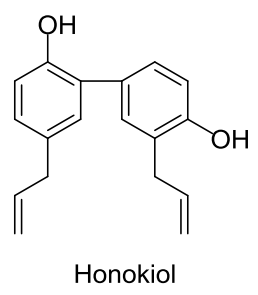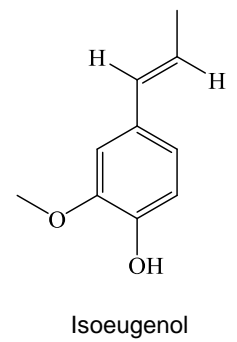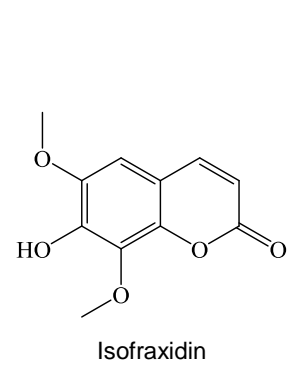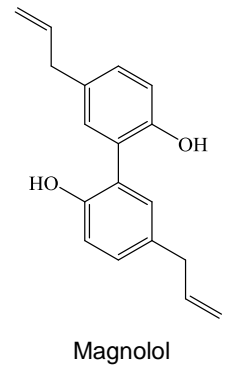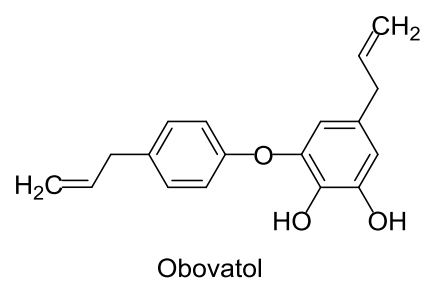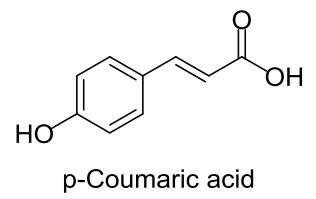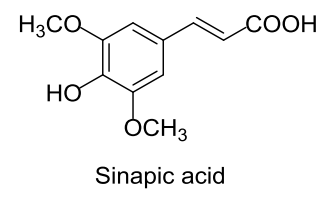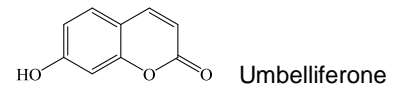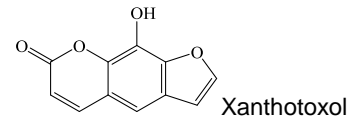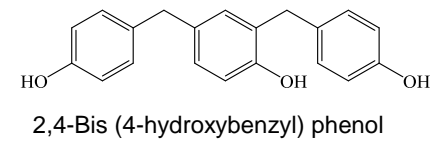



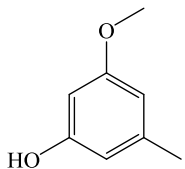

3-Methoxy-5-methylphenol

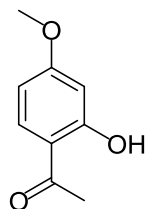

Paeonol

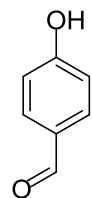

4-Hydroxybenzaldehyde

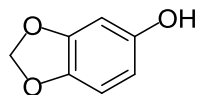

Sesamol

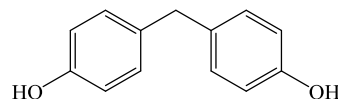

4,4'-Methylenebis (Phenol)

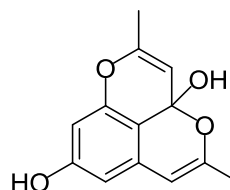

Barakol

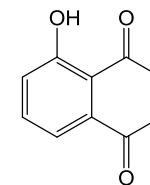

5-Hydroxy-1,4-naphthalenedione

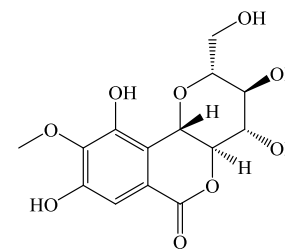

Bergenin

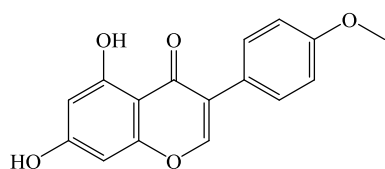

Biochanin A

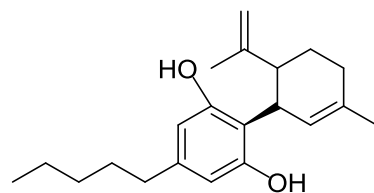

Cannabidiol

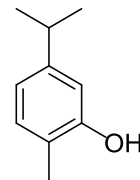

Carvacrol

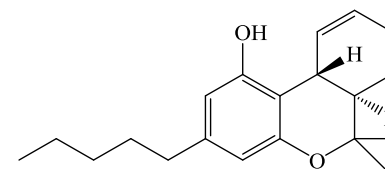

Dronabinol

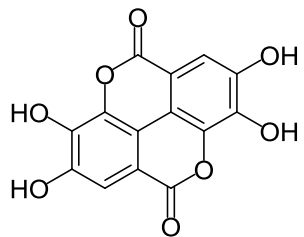

Ellagic acid

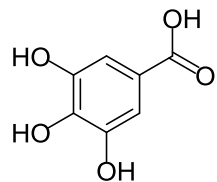

Gallic acid

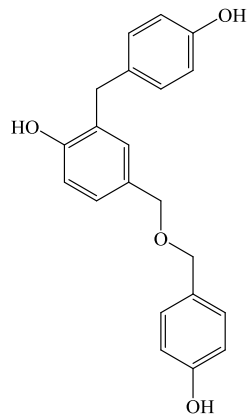

Gestrol

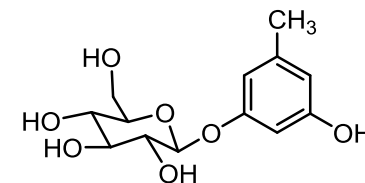

Orcinol glucoside

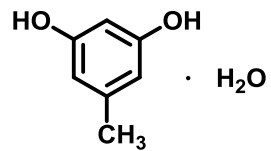

Orcinol monohydrate

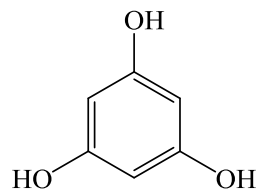

Phloroglucinol

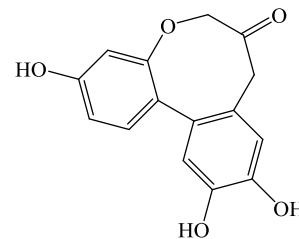

Protosappanin A

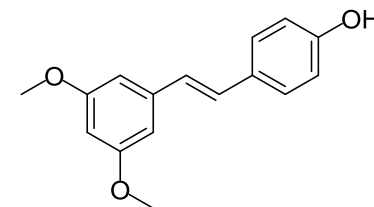

Pterostilbene

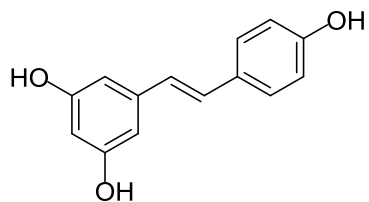

Resveratrol

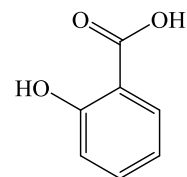

Salicylic acid

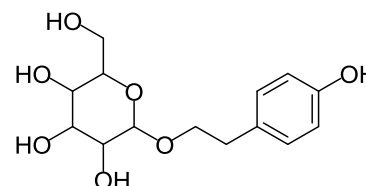

Salidroside

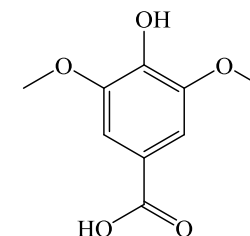

Syringic acid

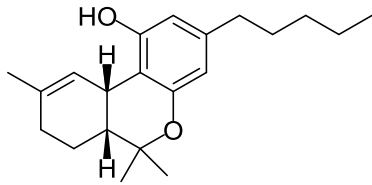

9-Tetrahydrocannabinol

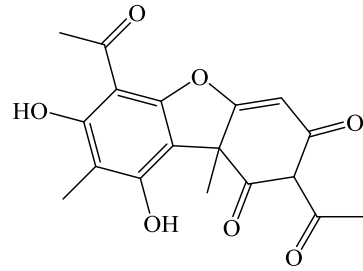

Usnic acid

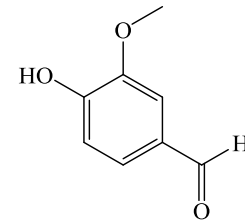

Vanillin

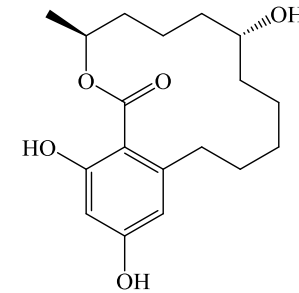

Zeranol

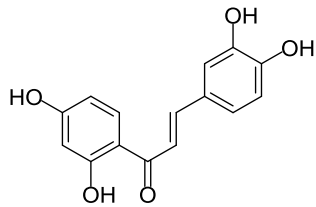

2,4,3,4-Trihydroxychalcone Isoliquiritigenin.BUT

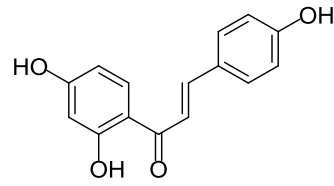

2,4,4-Trihydroxychalcone Isoliquiritigenin.ISL

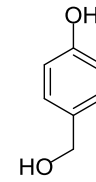

4-Hydroxybenzyl alcohol

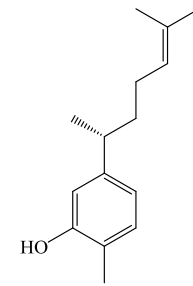

Xanthorrhizol

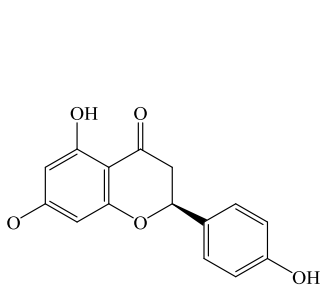

Sakuranetin

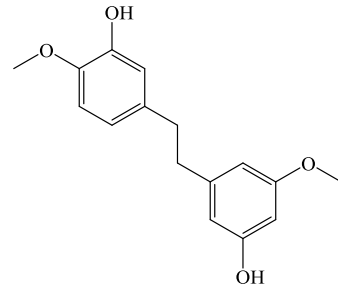

Gigantol

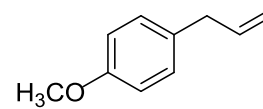

Estragole

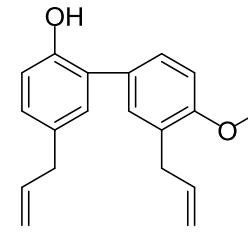

4-O-methylhonokiol

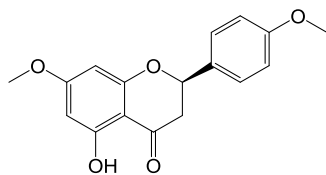

naringenin-4',7-dimethyl

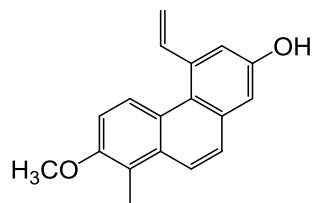

2-Methoxy-7-hydroxy-1-methyl-5-vinyl Phenanthrene

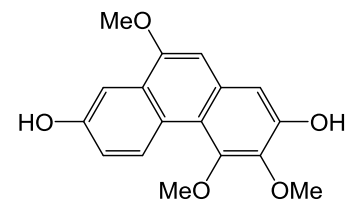

2,3,4-Trimethoxy-7,9-phenanthrenediol

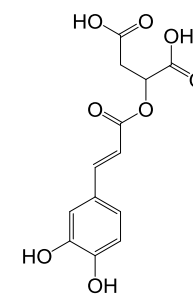

(+)-Caffeoylmalic acid

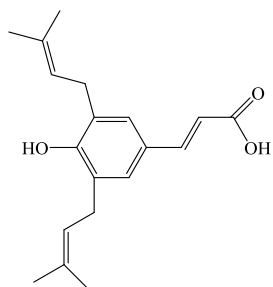

3,5-Diprenyl-4-hydroxycinnamic acid

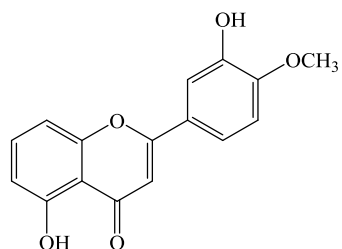

5,3'-Dihydroxyl-4'-methoxyl-flavone

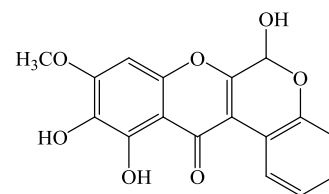

9-O-methyl-10-hydroxycoccineone B

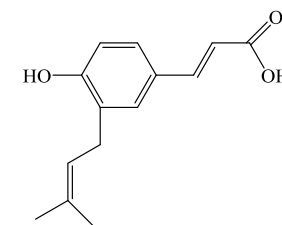

3-Prenyl-4-hydroxycinnamic acid

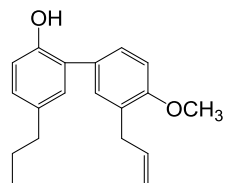

4-O-methoxydihydroonokiol

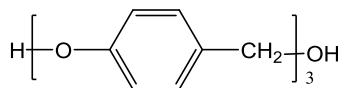

4-[[4-[(4-Hydroxyphenyl)methoxy]phenyl]methoxy]-benzenemethanol

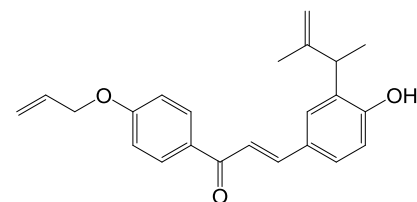

3-[3-(1,2-dimethyl-2-propen-1-yl)-4-hydroxyphenyl]-1-[4-(2-propen-1-yloxy)phenyl]- (2E)-2-Propen-1-one

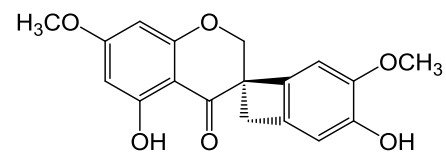

(R)-3,5-dihydroxy-4,7-dimethoxyspiro [2H-1-benzopyran-3(4H),7-bicyclo[4.2.0]-octa[1,3,5]-trien]-4-one

Figure S2. Docking modes between potential agonists of hRyR1 and hRyR1.

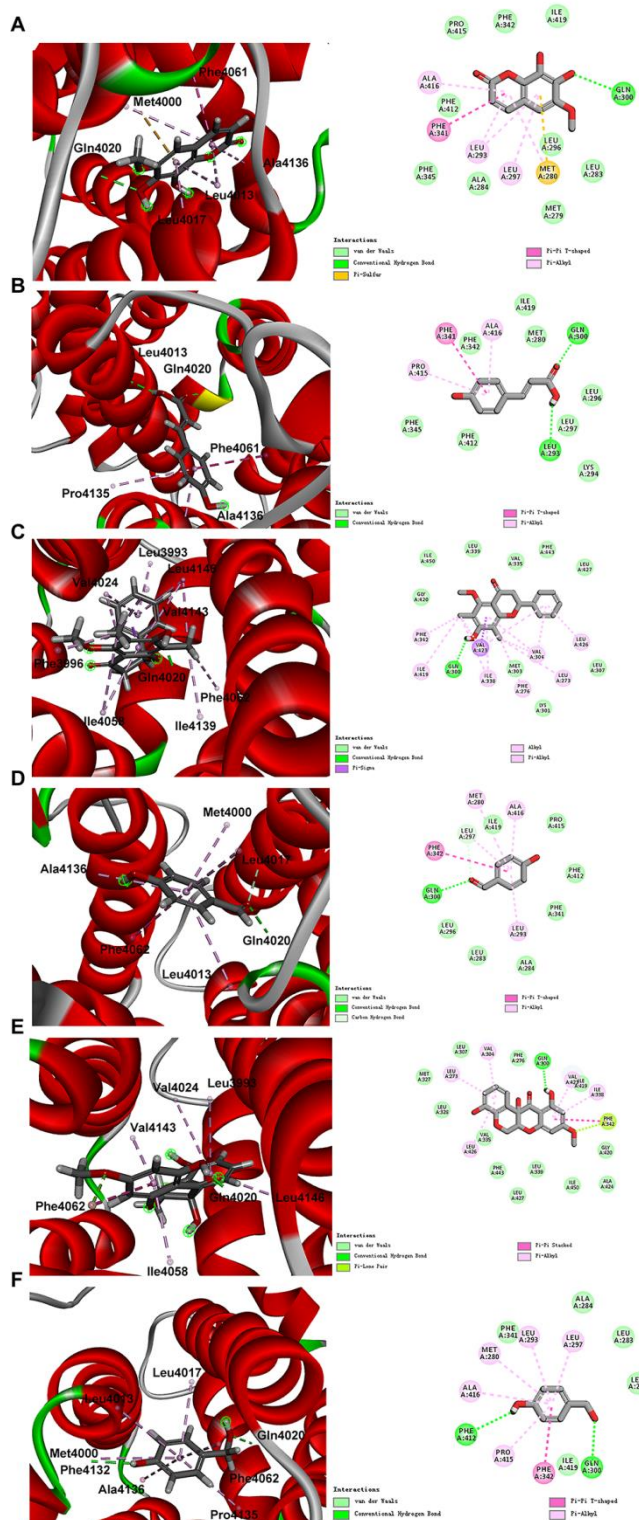

Figure S2. Docking modes between potential agonists of hRyR1 and hRyR1. Note: (A) Fraxetin penetrated into the active pocket, and mainly formed one hydrogen bond with the Gln4020 residue on the protein, a total of 5 residues were bound by hydrophobic interaction on the hRyR1. (B)The *p*-coumaric acid small molecule

completely penetrated into the active pocket, forming 2 hydrogen bonds with the Gln4020, Leu4013 residues on the protein. The hydrophobic interaction residues of the *p*-coumaric acid molecule were 3. (C) The 7-hydroxy-5-methoxy-6,8-dimethyl-flavanone molecule completely entered the active pocket, Gln4020 residues formed one hydrogen bond, a total of 8 hydrophobic residues. (D) 4-hydroxybenzaldehyde small molecule deeped into the active pocket, forming 2 hydrogen bonds with Gln4020, Leu4017 and 5 residues formed a hydrophobic effect. (E)10-Demethylboeravinone C completely entered the active pocket and formed a hydrophobic interaction with 6 residues. (F) The 4-hydroxybenzylalcohol molecule completely penetrated into the active pocket, forming 4 hydrogen bonds with Gln4020 and a total of 6 hydrophobic residues.

**Figure S3. Effects of the positive small-molecule phenol 4-CmC on the viability of RTSMCs.**

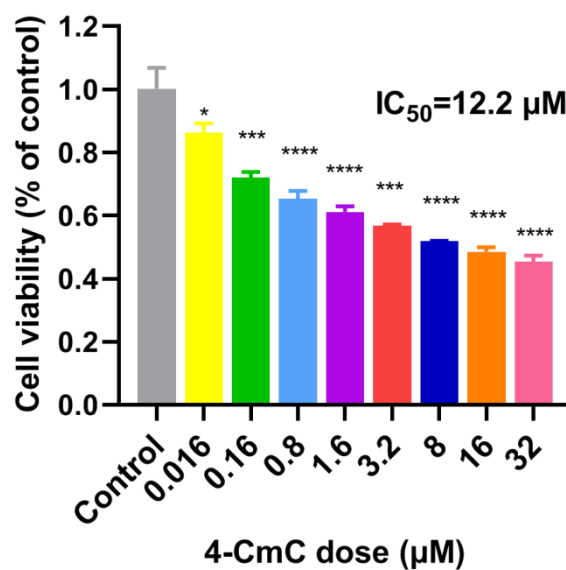

**Figure S3. Effects of the positive small-molecule phenol 4-CmC on the viability of RTSMCs. Note:**

Significant differences from control group are denoted by \* $P < 0.05$ , \*\*\* $P < 0.001$ , \*\*\*\* $P < 0.0001$ . Differences were assessed for significance by Dunnett's T3 multiple comparisons test subsequent to significant one-way ANOVA.



**Table S1. Effects of potential NSMPs on RTSMCs viability**

| <b>Group</b> | <b>Concentration<br/>(<math>\mu</math>M)</b> | <b>Absorbance<br/>(A)</b>       | <b>Cell viability<br/>rate<br/>(%)</b> | <b>IC50<br/>(<math>\mu</math>M)</b> |
|--------------|----------------------------------------------|---------------------------------|----------------------------------------|-------------------------------------|
| Xanthotoxol  | 0                                            | 1.02 $\pm$ 0.06                 | 100.00 $\pm$ 0.00                      | 28.29                               |
|              | 0.016                                        | 0.95 $\pm$ 0.01                 | 92.94 $\pm$ 0.01                       |                                     |
|              | 0.16                                         | 0.80 $\pm$ 0.02                 | 78.72 $\pm$ 0.02 <sup>***</sup>        |                                     |
|              | 0.80                                         | 0.71 $\pm$ 0.02                 | 69.89 $\pm$ 0.02 <sup>****</sup>       |                                     |
|              | 1.6                                          | 0.67 $\pm$ 0.01 <sup>*</sup>    | 65.95 $\pm$ 0.01 <sup>****</sup>       |                                     |
|              | 3.2                                          | 0.64 $\pm$ 0.02 <sup>**</sup>   | 62.64 $\pm$ 0.02 <sup>****</sup>       |                                     |
|              | 8.0                                          | 0.58 $\pm$ 0.01 <sup>**</sup>   | 56.87 $\pm$ 0.01 <sup>****</sup>       |                                     |
|              | 16                                           | 0.55 $\pm$ 0.02 <sup>**</sup>   | 53.55 $\pm$ 0.02 <sup>****</sup>       |                                     |
|              | 32                                           | 0.50 $\pm$ 0.01 <sup>**</sup>   | 49.55 $\pm$ 0.01 <sup>****</sup>       |                                     |
| Danshensu    | 0                                            | 1.02 $\pm$ 0.06                 | 100.00 $\pm$ 0.00                      | 2.57                                |
|              | 0.016                                        | 0.86 $\pm$ 0.03 <sup>*</sup>    | 84.70 $\pm$ 0.02 <sup>**</sup>         |                                     |
|              | 0.16                                         | 0.71 $\pm$ 0.02 <sup>**</sup>   | 69.55 $\pm$ 0.02 <sup>****</sup>       |                                     |
|              | 0.80                                         | 0.60 $\pm$ 0.02 <sup>**</sup>   | 58.55 $\pm$ 0.02 <sup>****</sup>       |                                     |
|              | 1.6                                          | 0.54 $\pm$ 0.03 <sup>**</sup>   | 53.53 $\pm$ 0.03 <sup>****</sup>       |                                     |
|              | 3.2                                          | 0.50 $\pm$ 0.02 <sup>**</sup>   | 48.95 $\pm$ 0.02 <sup>****</sup>       |                                     |
|              | 8.0                                          | 0.42 $\pm$ 0.01 <sup>**</sup>   | 41.08 $\pm$ 0.01 <sup>****</sup>       |                                     |
|              | 16                                           | 0.37 $\pm$ 0.01 <sup>**</sup>   | 36.21 $\pm$ 0.01 <sup>****</sup>       |                                     |
|              | 32                                           | 0.34 $\pm$ 0.01 <sup>**</sup>   | 33.57 $\pm$ 0.01 <sup>****</sup>       |                                     |
| Juglone      | 0                                            | 1.02 $\pm$ 0.06                 | 100.00 $\pm$ 0.00                      | 0.38                                |
|              | 0.016                                        | 0.66 $\pm$ 0.01                 | 64.70 $\pm$ 0.01                       |                                     |
|              | 0.16                                         | 0.54 $\pm$ 0.02                 | 52.96 $\pm$ 0.02                       |                                     |
|              | 0.80                                         | 0.47 $\pm$ 0.02                 | 46.23 $\pm$ 0.02                       |                                     |
|              | 1.6                                          | 0.44 $\pm$ 0.02 <sup>*</sup>    | 43.22 $\pm$ 0.02                       |                                     |
|              | 3.2                                          | 0.40 $\pm$ 0.02 <sup>**</sup>   | 39.76 $\pm$ 0.02 <sup>*</sup>          |                                     |
|              | 8.0                                          | 0.39 $\pm$ 0.01 <sup>**</sup>   | 38.20 $\pm$ 0.01 <sup>*</sup>          |                                     |
|              | 16                                           | 0.34 $\pm$ 0.01 <sup>**</sup>   | 33.81 $\pm$ 0.01 <sup>**</sup>         |                                     |
|              | 32                                           | 0.31 $\pm$ 0.02 <sup>**</sup>   | 30.73 $\pm$ 0.02 <sup>***</sup>        |                                     |
| Vanillin     | 0                                            | 1.02 $\pm$ 0.06                 | 100.00 $\pm$ 0.00                      | 0.98                                |
|              | 0.016                                        | 0.75 $\pm$ 0.01 <sup>****</sup> | 73.51 $\pm$ 0.01 <sup>****</sup>       |                                     |
|              | 0.16                                         | 0.61 $\pm$ 0.02 <sup>****</sup> | 59.81 $\pm$ 0.02 <sup>****</sup>       |                                     |
|              | 0.80                                         | 0.53 $\pm$ 0.03 <sup>****</sup> | 51.97 $\pm$ 0.03 <sup>****</sup>       |                                     |
|              | 1.6                                          | 0.50 $\pm$ 0.01 <sup>****</sup> | 48.67 $\pm$ 0.01 <sup>****</sup>       |                                     |
|              | 3.2                                          | 0.43 $\pm$ 0.02 <sup>****</sup> | 42.53 $\pm$ 0.02 <sup>****</sup>       |                                     |
|              | 8.0                                          | 0.39 $\pm$ 0.01 <sup>****</sup> | 37.87 $\pm$ 0.01 <sup>****</sup>       |                                     |
|              | 16                                           | 0.35 $\pm$ 0.02 <sup>****</sup> | 34.78 $\pm$ 0.02 <sup>****</sup>       |                                     |
|              | 32                                           | 0.29 $\pm$ 0.01 <sup>****</sup> | 28.36 $\pm$ 0.01 <sup>****</sup>       |                                     |

**Table S1 continued**

| Group                   | Concentration (μM) | Absorbance (A)             | Cell viability rate (%)     | IC50 (μM) |
|-------------------------|--------------------|----------------------------|-----------------------------|-----------|
| Paeonol                 | 0                  | 1.02±0.06                  | 100.00±0.00                 | 29.46     |
|                         | 0.016              | 0.75±0.02                  | 73.90±0.02 <sup>****</sup>  |           |
|                         | 0.16               | 0.69±0.02                  | 67.64±0.02 <sup>****</sup>  |           |
|                         | 0.80               | 0.63±0.03                  | 61.56±0.03 <sup>****</sup>  |           |
|                         | 1.6                | 0.59±0.01                  | 58.45±0.01 <sup>****</sup>  |           |
|                         | 3.2                | 0.59±0.03                  | 57.66±0.03 <sup>****</sup>  |           |
|                         | 8.0                | 0.56±0.01 <sup>*</sup>     | 55.50±0.01 <sup>****</sup>  |           |
|                         | 16                 | 0.53±0.01 <sup>**</sup>    | 51.97±0.01 <sup>****</sup>  |           |
|                         | 32                 | 0.50±0.01 <sup>***</sup>   | 48.80±0.01 <sup>****</sup>  |           |
| Caffeic acid            | 0                  | 1.02±0.06                  | 100.00±0.00                 | 6.15      |
|                         | 0.016              | 0.84±0.01 <sup>**</sup>    | 82.76±0.01 <sup>**</sup>    |           |
|                         | 0.16               | 0.71±0.01 <sup>****</sup>  | 69.52±0.01 <sup>****</sup>  |           |
|                         | 0.80               | 0.61±0.01 <sup>****</sup>  | 59.54±0.01 <sup>****</sup>  |           |
|                         | 1.6                | 0.58±0.01 <sup>****</sup>  | 56.79±0.01 <sup>****</sup>  |           |
|                         | 3.2                | 0.54±0.01 <sup>****</sup>  | 52.73±0.01 <sup>****</sup>  |           |
|                         | 8.0                | 0.52±0.003 <sup>****</sup> | 51.00±0.003 <sup>****</sup> |           |
|                         | 16                 | 0.45±0.03 <sup>****</sup>  | 44.61±0.03 <sup>****</sup>  |           |
|                         | 32                 | 0.42±0.02 <sup>****</sup>  | 40.99±0.02 <sup>****</sup>  |           |
| Fraxetin                | 0                  | 1.02±0.06                  | 100.00±0.00                 | 1.78      |
|                         | 0.016              | 0.87±0.01 <sup>**</sup>    | 85.81±0.01 <sup>**</sup>    |           |
|                         | 0.16               | 0.71±0.02 <sup>****</sup>  | 69.46±0.02 <sup>****</sup>  |           |
|                         | 0.80               | 0.56±0.01 <sup>****</sup>  | 55.38±0.01 <sup>****</sup>  |           |
|                         | 1.6                | 0.53±0.02 <sup>****</sup>  | 52.07±0.02 <sup>****</sup>  |           |
|                         | 3.2                | 0.45±0.02 <sup>****</sup>  | 44.48±0.02 <sup>****</sup>  |           |
|                         | 8.0                | 0.39±0.02 <sup>****</sup>  | 38.37±0.02 <sup>****</sup>  |           |
|                         | 16                 | 0.35±0.02 <sup>****</sup>  | 34.60±0.02 <sup>****</sup>  |           |
|                         | 32                 | 0.27±0.02 <sup>****</sup>  | 26.52±0.02 <sup>****</sup>  |           |
| <i>p</i> -Coumaric acid | 0                  | 1.02±0.06                  | 100.00±0.00                 | 3.90      |
|                         | 0.016              | 0.97±0.02                  | 95.63±0.02                  |           |
|                         | 0.16               | 0.79±0.002                 | 77.27±0.002                 |           |
|                         | 0.80               | 0.65±0.02                  | 64.19±0.02                  |           |
|                         | 1.6                | 0.59±0.01                  | 58.02±0.01                  |           |
|                         | 3.2                | 0.52±0.02                  | 50.77±0.02                  |           |
|                         | 8.0                | 0.44±0.02 <sup>*</sup>     | 43.30±0.02 <sup>*</sup>     |           |
|                         | 16                 | 0.40±0.02 <sup>**</sup>    | 39.73±0.02 <sup>**</sup>    |           |
|                         | 32                 | 0.32±0.01 <sup>***</sup>   | 31.13±0.01 <sup>***</sup>   |           |

**Table S1 continued**

| Group                  | Concentration (μM) | Absorbance (A) | Cell viability rate (%) | IC50 (μM) |
|------------------------|--------------------|----------------|-------------------------|-----------|
| 4-hydroxybenzaldehyde  | 0                  | 1.02±0.06      | 100.00±0.00             | 14.48     |
|                        | 0.016              | 0.75±0.02****  | 73.23±0.02****          |           |
|                        | 0.16               | 0.68±0.02****  | 67.04±0.02****          |           |
|                        | 0.80               | 0.60±0.02****  | 58.84±0.02****          |           |
|                        | 1.6                | 0.59±0.02****  | 58.34±0.02****          |           |
|                        | 3.2                | 0.56±0.02****  | 54.95±0.02****          |           |
|                        | 8.0                | 0.53±0.002**** | 52.10±0.002****         |           |
|                        | 16                 | 0.50±0.03****  | 49.62±0.03****          |           |
| 4-hydroxybenzylalcohol | 0                  | 1.02±0.06      | 100.00±0.00             | 9.44      |
|                        | 0.016              | 0.78±0.005     | 77.04±0.01              |           |
|                        | 0.16               | 0.67±0.03      | 66.31±0.03              |           |
|                        | 0.80               | 0.61±0.01      | 59.86±0.01              |           |
|                        | 1.6                | 0.59±0.01      | 58.22±0.01              |           |
|                        | 3.2                | 0.54±0.001*    | 53.10±0.001*            |           |
|                        | 8.0                | 0.53±0.02*     | 51.61±0.02*             |           |
|                        | 16                 | 0.48±0.02***   | 46.95±0.02***           |           |
|                        | 32                 | 0.47±0.02***   | 45.78±0.02***           |           |

\* $P<0.05$ , \*\* $P<0.01$ , \*\*\* $P<0.001$ , \*\*\*\* $P<0.0001$  compared with the control group, n=3
